# Supplementary material for: Determination of d- and l-Amino Acids in Garlic Foodstuffs by Liquid Chromatography–Tandem Mass Spectrometry
Source: MDPI journal article supplement (doi:10.3390/molecules28041773), 2023-02-13
Supplement: s1 [file s1]

*Molecules*

*Supplementary Materials*

## **Determination of D- and L-Amino Acids in Garlic Foodstuffs by Liquid Chromatography–Tandem Mass Spectrometry**

Mayu Onozato, Haruna Nakanoue, Tatsuya Sakamoto, Maho Umino, and Takeshi Fukushima \*

Faculty of Pharmaceutical Sciences, Toho University; 2-2-1 Miyama, Funabashi-shi, Chiba 274-8510, Japan.

\* Correspondence e-mail: [t-fukushima@phar.toho-u.ac.jp](mailto:t-fukushima@phar.toho-u.ac.jp)

## **Contents**

|                                                                                                                                                                      |                     |
|----------------------------------------------------------------------------------------------------------------------------------------------------------------------|---------------------|
| <b>Chemicals and reagents</b>                                                                                                                                        | <b>..... Page 3</b> |
| <b>Figure S1 Chromatograms of DL-Ser and GABA obtained using mobile phase A at different pH levels.</b>                                                              | <b>..... Page 5</b> |
| <b>Table S1 Transitions for multiple-reaction monitoring (MRM) of amino acids and the corresponding internal standard (IS).</b>                                      | <b>..... Page 6</b> |
| <b>Table S2 Limit of detection (LOD, <math>S/N = 3</math>) for amino acids (fmol/injection).</b>                                                                     | <b>..... Page 7</b> |
| <b>Table S3 Intra- and inter-day accuracy and precision of the proposed LC–MS/MS method for the determination of free D- and L-amino acids in garlic foodstuffs.</b> | <b>..... Page 8</b> |

## 1 Chemicals and reagents

L-Alanine (Ala), L-arginine (Arg), L-asparagine (Asn), L-aspartic acid (Asp), L-citrulline (Cit),  $\gamma$ -aminobutyric acid (GABA), L-glutamine (Gln), L-glutamate (Glu), glycine (Gly), L-histidine (His), L-isoleucine (Ile), L-leucine (Leu), L-lysine (Lys), L-methionine (Met), L-phenylalanine (Phe), L-proline (Pro), L-serine (Ser), L-tryptophan (Trp), L-threonine (Thr), L-tyrosine (Tyr), L-valine (Val), and L-ornithine (Orn) were obtained from Kyowa Hakko Bio Co., Ltd. (Tokyo, Japan). D-Ala, D-Phe, D-Trp, D-Ser, LC-MS-grade CH<sub>3</sub>OH, HPLC-grade formic acid, and APDSTAG<sup>®</sup> Wako Amino Acids Internal Standard Mixture Solution were obtained from FUJIFILM Wako Pure Chemical Corporation (Osaka, Japan). *N,N*-Dimethylaminopyridine (DMAP), D-Ala, D-Arg, D-Asn, D-Asp, D-Gln, D-Glu, D-His, D-Ile, D-Leu, D-Lys, D-Thr, and D-Val were purchased from Tokyo Chemical Industry Co., Ltd. (Tokyo, Japan), and D-kynurenine (KYN), L-KYN, D-Met, D-Tyr, DL-Orn, D-Pro, and ammonium formate were procured from Sigma-Aldrich Co., Ltd. (St. Louis, MO, USA). DL-Cit was purchased from Matrix Scientific (Columbia, SC, USA), and LC-MS-grade CH<sub>3</sub>CN was obtained from Kanto Kagaku Co., Ltd. (Tokyo, Japan). The anion-exchange syringe-type cartridge, InertSep<sup>®</sup> NH<sub>2</sub> (50 mg/mL), was purchased from GL Sciences Inc. (Tokyo, Japan), and the water used was purified using a Milli-Q Labo system (Nihon Millipore Co. Ltd., Tokyo, Japan). Millex<sup>®</sup>-

LG filters (0.20  $\mu\text{m}$ ) were purchased from Merck Ltd. (Darmstadt, Germany).

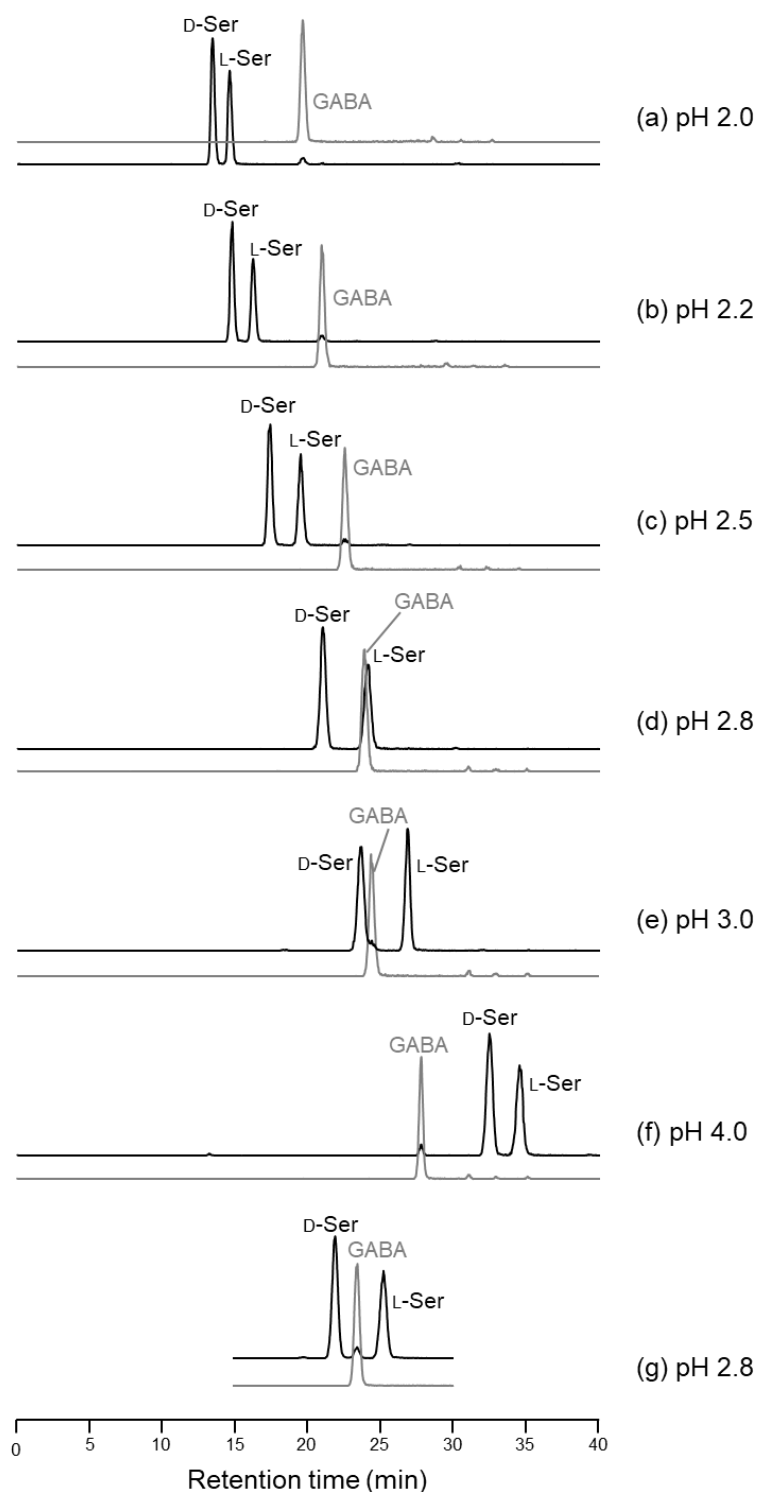

**Figure S1** Chromatograms of DL-Ser and GABA obtained using mobile phase A at different pH levels. Mobile phase A) (a–f): H<sub>2</sub>O/MeOH/10 mM ammonium formate (1/1/3, v/v/v), (g) H<sub>2</sub>O/MeOH/10 mM ammonium formate (pH: 2.8, (5/2/3, v/v/v), B) 10 mM ammonium formate in [H<sub>2</sub>O/MeOH (3/7, v/v)]. The time program for gradient elution of A) and B) is described in the text.

**Table S1 Transitions for multiple-reaction monitoring (MRM) of amino acids and the corresponding internal standard (IS)**

| Amino acid |           |   |         | IS     |           |   |         |
|------------|-----------|---|---------|--------|-----------|---|---------|
|            | Precursor |   | Product |        | Precursor |   | Product |
| Asn        | 407.30    | > | 91.10   | Asn-IS | 413.30    | > | 91.10   |
| Ala        | 364.20    | > | 91.10   | Ala-IS | 367.20    | > | 91.10   |
| Cit        | 450.10    | > | 91.10   | Cit-IS | 454.10    | > | 91.10   |
| Gln        | 421.20    | > | 91.10   | Gln-IS | 428.20    | > | 91.10   |
| Ser        | 380.10    | > | 91.10   | Ser-IS | 384.10    | > | 91.10   |
| Gly        | 350.20    | > | 91.10   | Gly-IS | 353.20    | > | 91.10   |
| GABA       | 378.05    | > | 91.15   | GABA   |           | — |         |
| Thr        | 394.10    | > | 91.10   | Thr-IS | 398.10    | > | 91.10   |
| Glu        | 422.10    | > | 91.10   | Glu-IS | 428.10    | > | 91.10   |
| Asp        | 408.10    | > | 91.10   | Asp-IS | 411.10    | > | 91.10   |
| His        | 430.20    | > | 91.10   | His-IS | 439.20    | > | 91.10   |
| Pro        | 390.10    | > | 91.10   | Pro-IS | 396.10    | > | 91.10   |
| Val        | 392.10    | > | 91.10   | Val-IS | 398.10    | > | 91.10   |
| Met        | 424.10    | > | 91.10   | Met-IS | 430.10    | > | 91.10   |
| Arg        | 449.20    | > | 91.10   | Arg-IS | 453.20    | > | 91.10   |
| KYN        | 483.30    | > | 91.10   | KYN-IS |           | — |         |
| Ile        | 406.10    | > | 91.10   | Ile-IS | 413.10    | > | 91.10   |
| Leu        | 406.10    | > | 91.10   | Leu-IS | 409.10    | > | 91.10   |
| Trp        | 479.30    | > | 91.10   | Trp-IS | 492.10    | > | 91.10   |
| Phe        | 440.10    | > | 91.10   | Phe-IS | 450.10    | > | 91.10   |
| Orn        | 681.40    | > | 91.10   | Orn-IS | 686.10    | > | 91.10   |
| Lys        | 695.40    | > | 91.10   | Lys-IS | 703.10    | > | 91.10   |
| Tyr        | 730.20    | > | 91.10   | Tyr-IS | 736.20    | > | 91.10   |

GABA-IS and KYN-IS were not included in APDSTAG<sup>®</sup> Wako Amino Acids Internal Standard Mixture Solution. Thus, Gly-IS and Met-IS were used as IS for GABA and KYN, respectively.

**Table S2 Limit of detection (LOD,  $S/N = 3$ ) for amino acids (fmol/injection).**

|     | D-Amino acid   |            | L-Amino acid   |            |
|-----|----------------|------------|----------------|------------|
|     | Previous study | This study | Previous study | This study |
| Asn | —              | 4.47       | 10.5           | 4.56       |
| Ala | 17.4           | 3.28       | 3.83           | 5.40       |
| Cit | —              | 3.90       | —              | 3.30       |
| Gln | —              | 4.38       | 238            | 3.71       |
| Ser | 5.75           | 3.30       | 9.68           | 3.43       |
| Thr | —              | 3.29       | 1.54           | 4.20       |
| Glu | —              | 4.89       | 36.0           | 7.42       |
| Asp | —              | 10.4       | 17.8           | 13.7       |
| His | —              | 5.35       | 8.31           | 3.79       |
| Pro | —              | 4.85       | 22.4           | 3.30       |
| Val | —              | 2.93       | 2.12           | 4.28       |
| Met | —              | 3.11       | 1.8            | 3.87       |
| Arg | —              | 2.65       | 4.52           | 2.42       |
| KYN | —              | 3.10       | —              | 3.38       |
| Ile | —              | 3.48       | 0.501          | 4.07       |
| Leu | —              | 2.94       | 0.628          | 3.87       |
| Trp | —              | 2.49       | 14.4           | 2.68       |
| Phe | —              | 3.23       | 4.20           | 2.94       |
| Orn | —              | 2.41       | 2.39           | 2.77       |
| Lys | —              | 2.41       | 4.07           | 2.55       |
| Tyr | —              | 2.07       | 4.25           | 2.66       |

  

|       | Previous study | This study |
|-------|----------------|------------|
| GABA  | —              | 5.04       |
| Gly   | 12.6           | 3.27       |
| β-Ala | —              | 3.92       |
